# Supplementary material for: Differential Homing Receptor Profiles of Lymphocytes Induced by Attenuated versus Live Plasmodium falciparum Sporozoites
Source: MDPI journal article supplement (doi:10.3390/vaccines10101768), 2022-10-21

**Supplementary Table S1:** Antibodies used for defining homing receptor profiles. Antibodies were separated into three separate staining panels (as assigned to specific panel)

| Panel | Antibody  | Fluorochrome  | Source          | Catalog number | Clone    | Dilution |
|-------|-----------|---------------|-----------------|----------------|----------|----------|
| All   | Viability |               |                 |                |          | 1:250    |
| All   | CD4       | FITC          | Miltenyi        | 130-113-253    | M-T466   | 1:50     |
| All   | CD3       | Vioblue       | Miltenyi        | 130-114-574    | BW264/56 | 1:50     |
| All   | CD8       | PerCP Vio 700 | Miltenyi        | 130-113-161    | BW135/80 | 1:50     |
| All   | CD19      | VioGreen      | Miltenyi        | 130-113-378    | LT20     | 1:50     |
| All   | CD69*     | APC Vio 770   | Miltenyi        | 130-112-616    | REA824   | 1:200    |
| 1     | CD186*    | PE            | Miltenyi        | 130-123-556    | REA458   | 1:100    |
| 1     | CD185*    | PE-Vio770     | Miltenyi        | 130-098-422    | REA103   | 1:300    |
| 1     | CD161     | APC           | Biolegend       | BL 339912      | HP-3G10  | 1:300    |
| 2     | CCR10     | PE            | Biolegend       | 341504         | 6588-5   | 1:100    |
| 2     | CD183     | PE Cy7        | Biolegend       | 353720         | G025H7   | 1:200    |
| 2     | CD196     | APC           | Biolegend       | 353413         | G034E3   | 1:50     |
| 3     | CCR9      | PE            | R&D System      | FAB179P-100    | 112509   | 1:50     |
| 3     | CD197     | PE Cy7        | Biolegend       | BL 353226      | G043H7   | 1:300    |
| 3     | CD103     | APC           | Beckman Coulter | BC B06204      | 2G5      | 1:100    |

\* indicates recombinant engineered antibodies (REA) clones

### Gating strategy

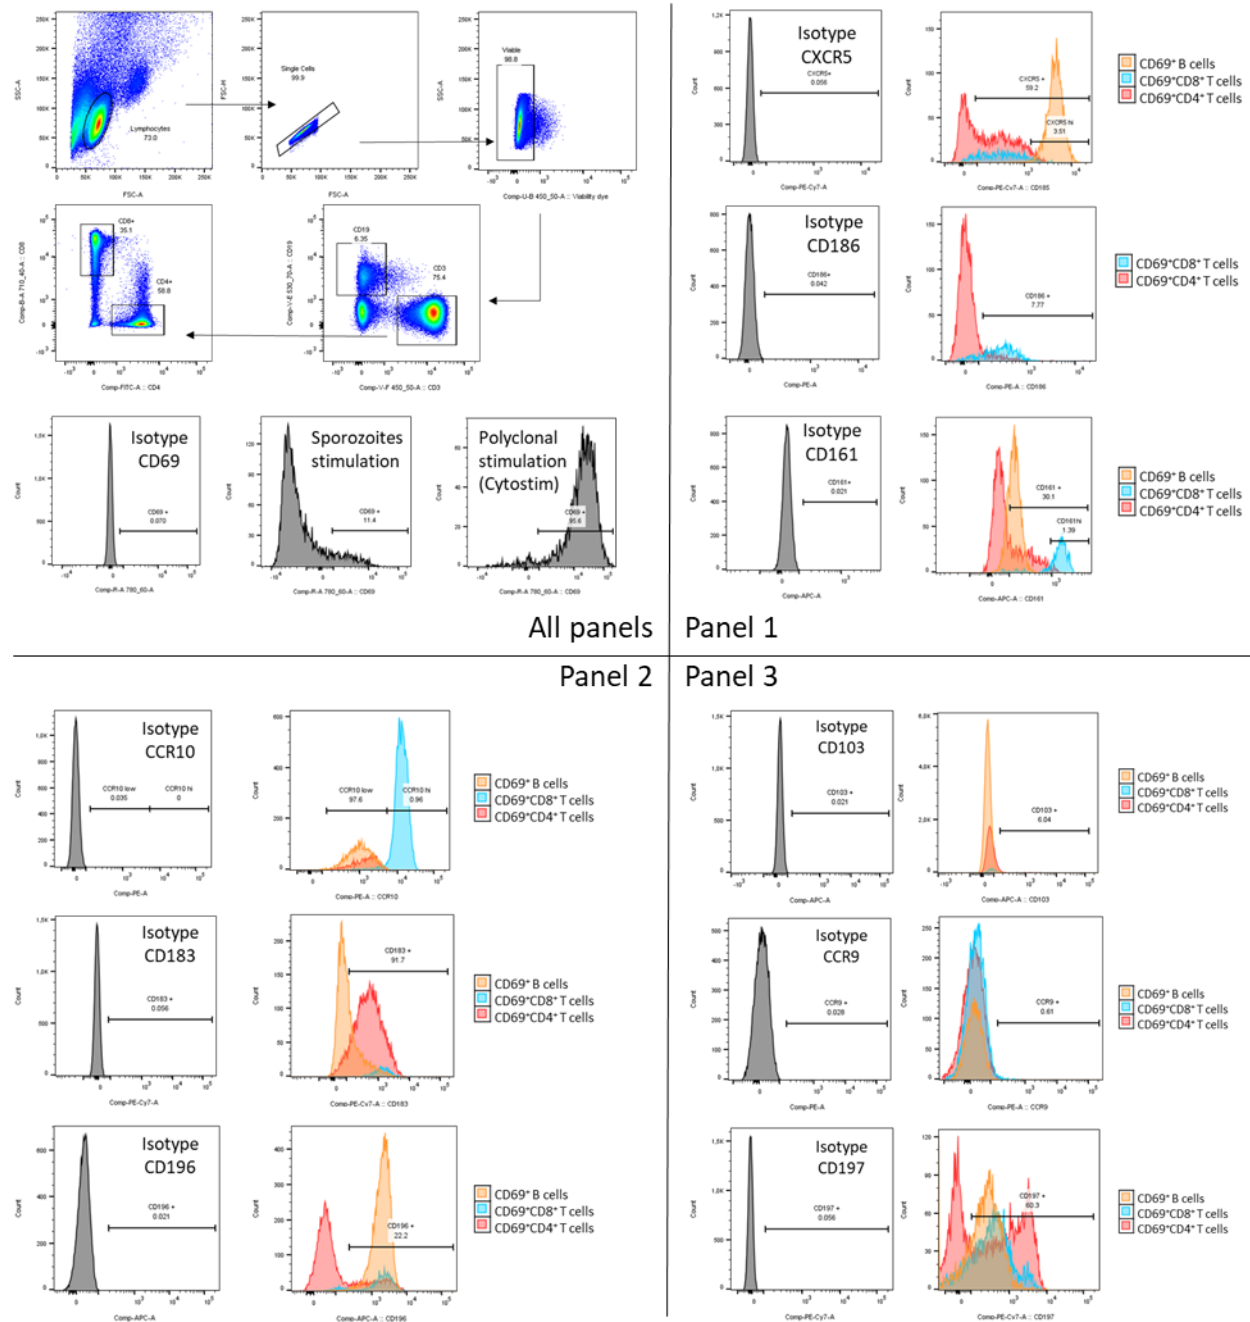

Supplementary Figure S2

Homing receptor profiles induced by RAS vaccination. The relationship between expressed homing receptors on SPZ-specific lymphocytes was investigated by generating a correlation matrix including all 16 parameters (lineage markers, homing receptors) after vaccination (T1, Panel A) and early after CHMI (T2, Panel B). The heatmap groups correlated immune measures by hierarchical clustering. The color indicates the degree of correlation between the different parameters (positive correlation in blue, negative correlation in red, highly correlated values in dark colors to weakly correlated values in light colors).

A

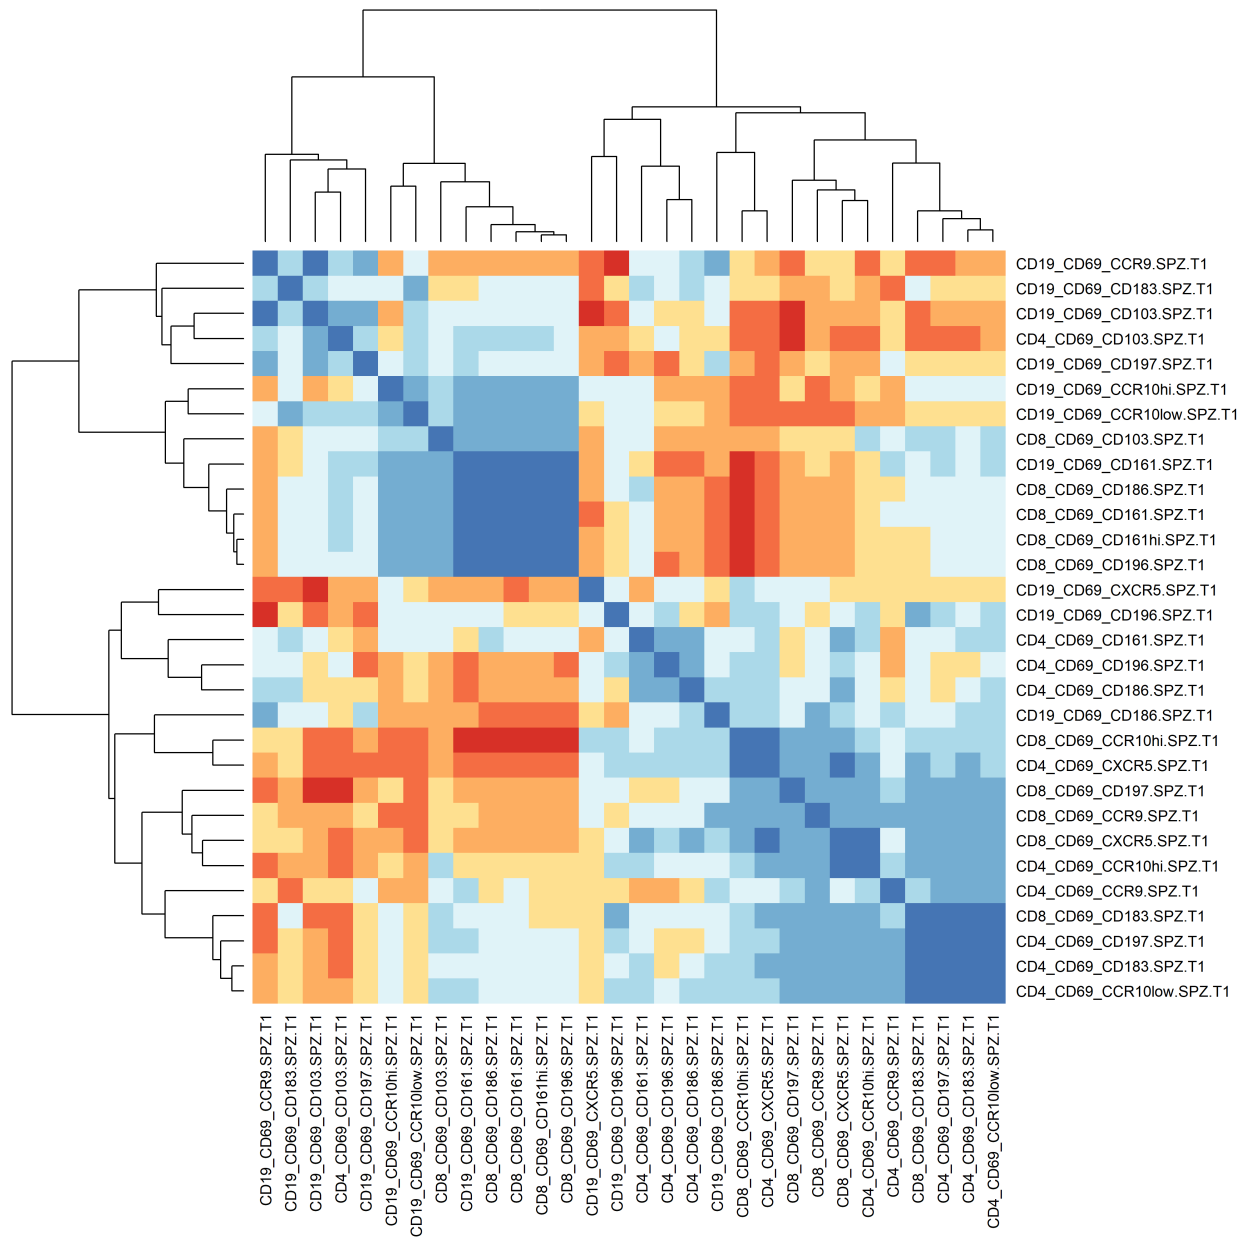

B

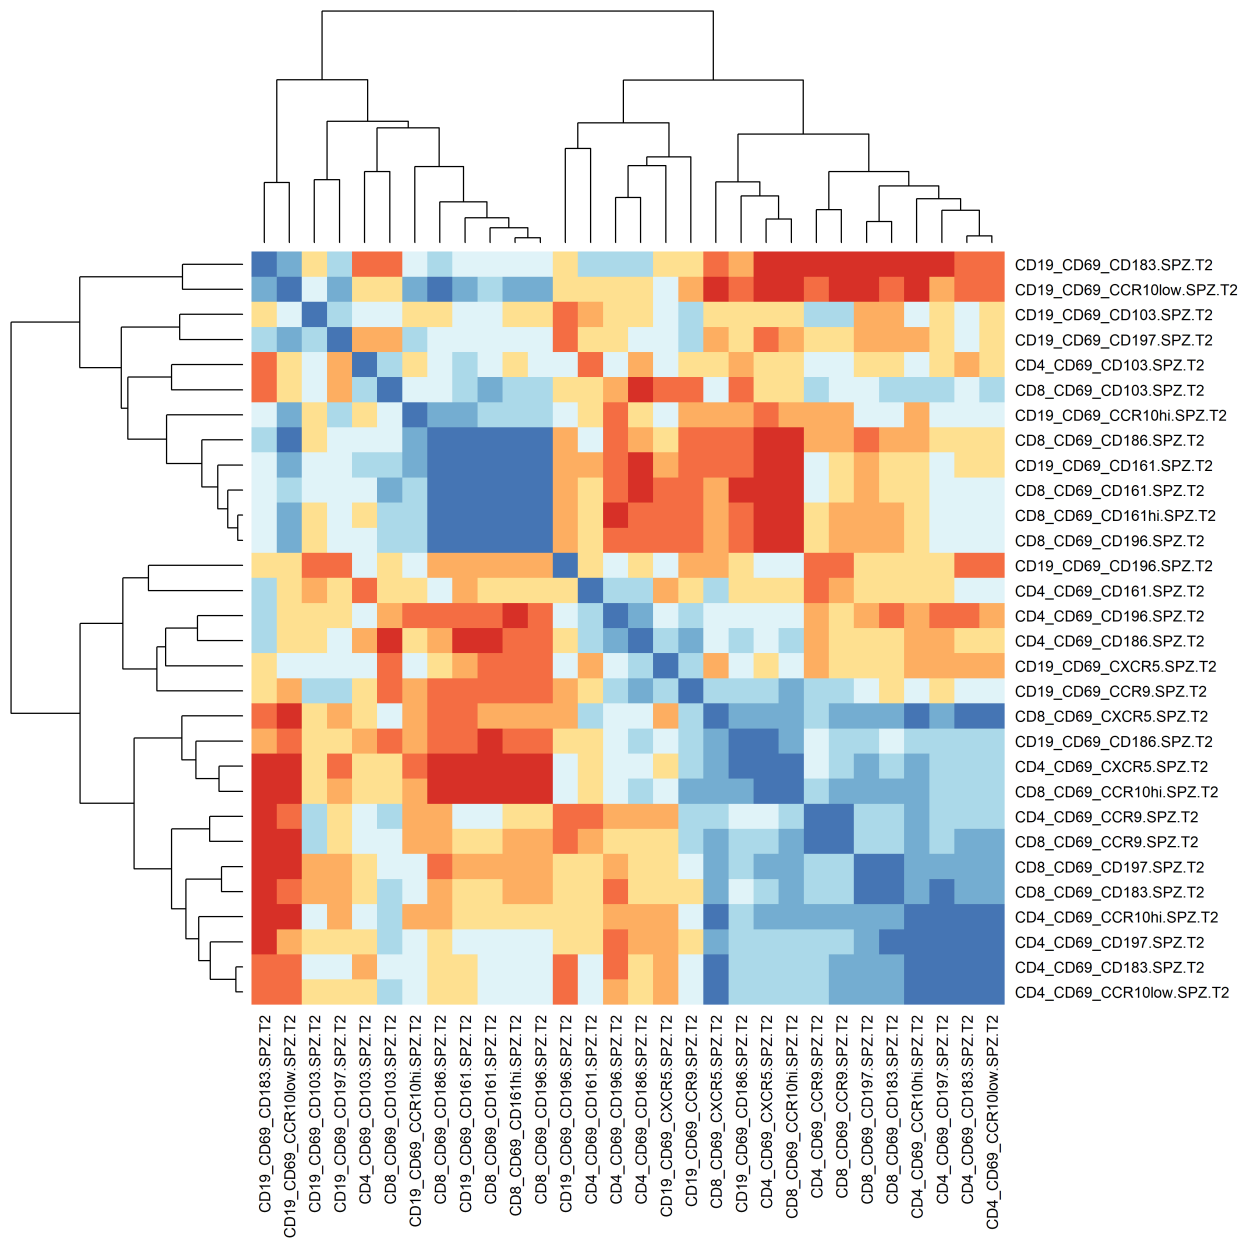

Supplement: s1 [file s1]
